# Supplementary material for: FAM83A exerts tumor-suppressive roles in cervical cancer by regulating integrins
Source: PubMed Central journal article supplement — Int J Oncol. 2020 Jun 9;57(2):509–21. doi: 10.3892/ijo.2020.5078 (PMC7307588; doi:10.3892/ijo.2020.5078), 2020-06-09

Figure S1. Transfection levels of FAM83A siRNAs. At 48 h post-transfection with si-FAM83A or si-NS, the expression levels of FAM83A mRNA in HeLa and CaSki cells were determined by reverse transcription-quantitative PCR. FAM83A, family with sequence similarity 83 member A; si, small interfering RNA; NS, scrambled control.

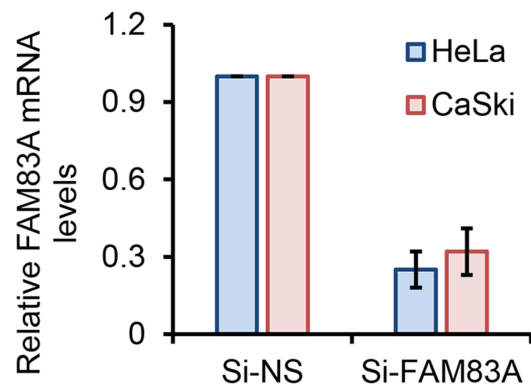

Figure S2. Kyoto Encyclopedia of Genes and Genomes pathway analysis. The 20 most significant suppressed (yellow) pathways in response to family with sequence similarity 83 member A knockdown are presented.

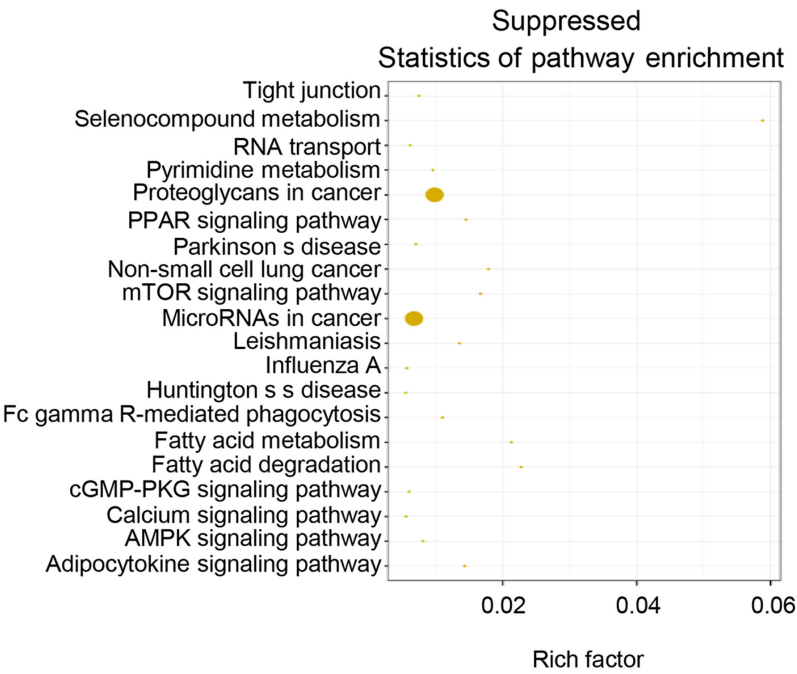

Figure S3. FAM83A knockdown increases p-PI3K and p-AKT expression. (A and B) Western blot analysis of the effects of FAM83A knockdown on p-PI3K and p-AKT expression in (A) HeLa and (B) CaSki cells. FAM83A, family with sequence similarity 83 member A; p, phosphorylated.

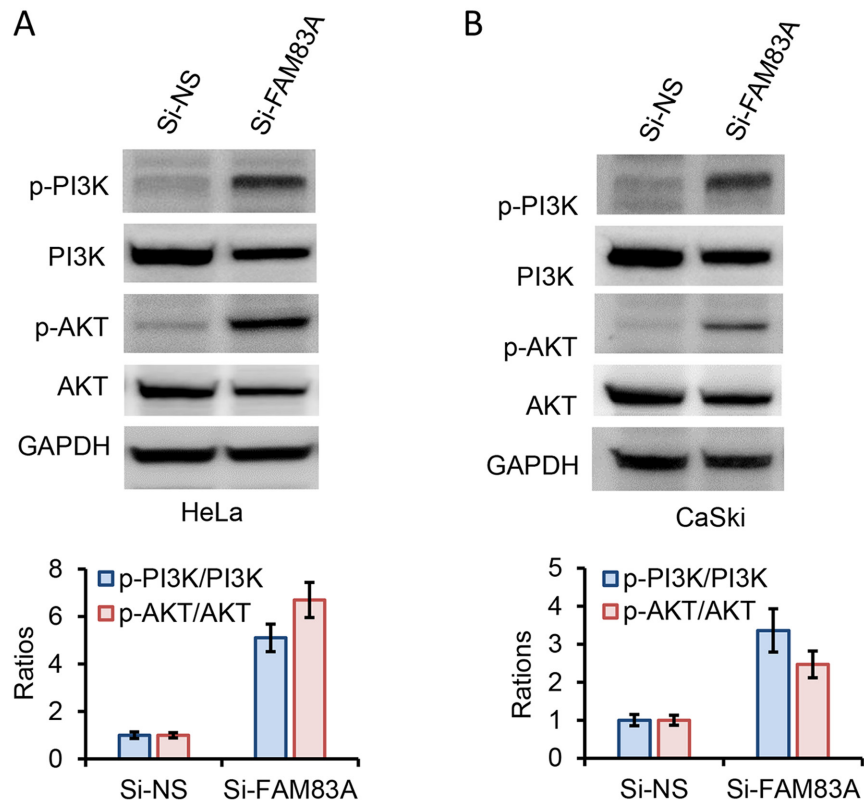

Figure S4. Expression of FAM83A in various types of tumors in TCGA and GTEx projects. The expression profile of FAM83A mRNA across all tumor and paired normal sample tissues in TCGA and GTEx RNA sequencing expression data. Each plot represents FAM83A mRNA expression. Red, upregulation; green, downregulation. FAM83A, family with sequence similarity 83 member A; T, tumor; N, normal

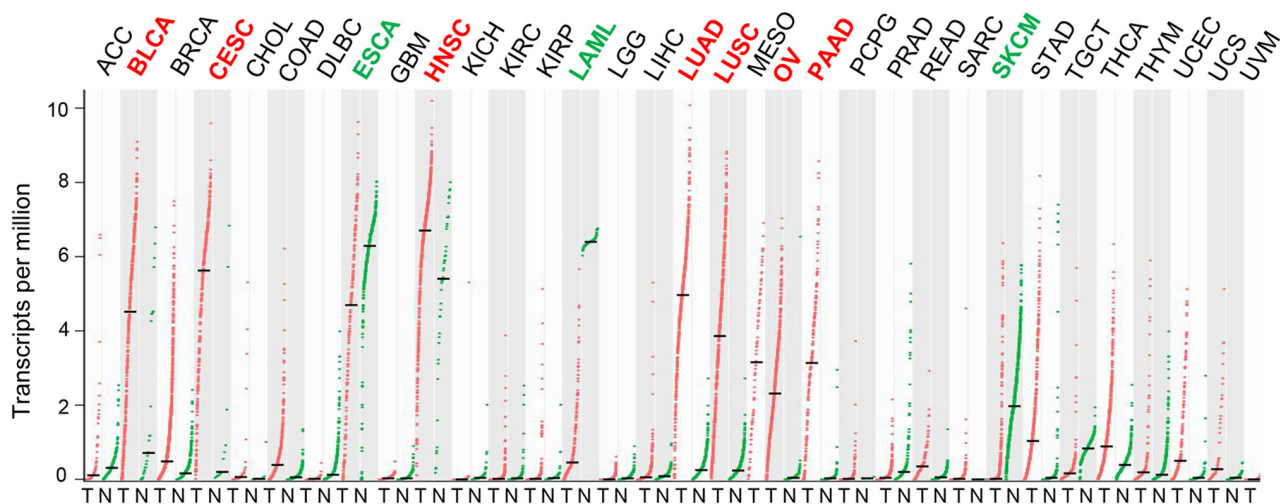

Supplement: Supplementary_Data1.pdf [file Supplementary_Data1.pdf]
